# Supplementary material for: Isolated inclusion body myopathy caused by a multisystem proteinopathy–linked hnRNPA1 mutation
Source: PubMed Central journal article supplement — Neurol Genet. 2015 Sep 24;1(3):e23. doi: 10.1212/NXG.0000000000000023 (PMC4809462; doi:10.1212/nxg.0000000000000023), 2015-09-24
Supplement: supp_1.3.e23_figure_e-1.pdf [file supp_1.3.e23_figure_e-1.pdf]

## Supplementary Figure e-1

Multiple immunohistochemistry for hnRNPA1 and A2B1

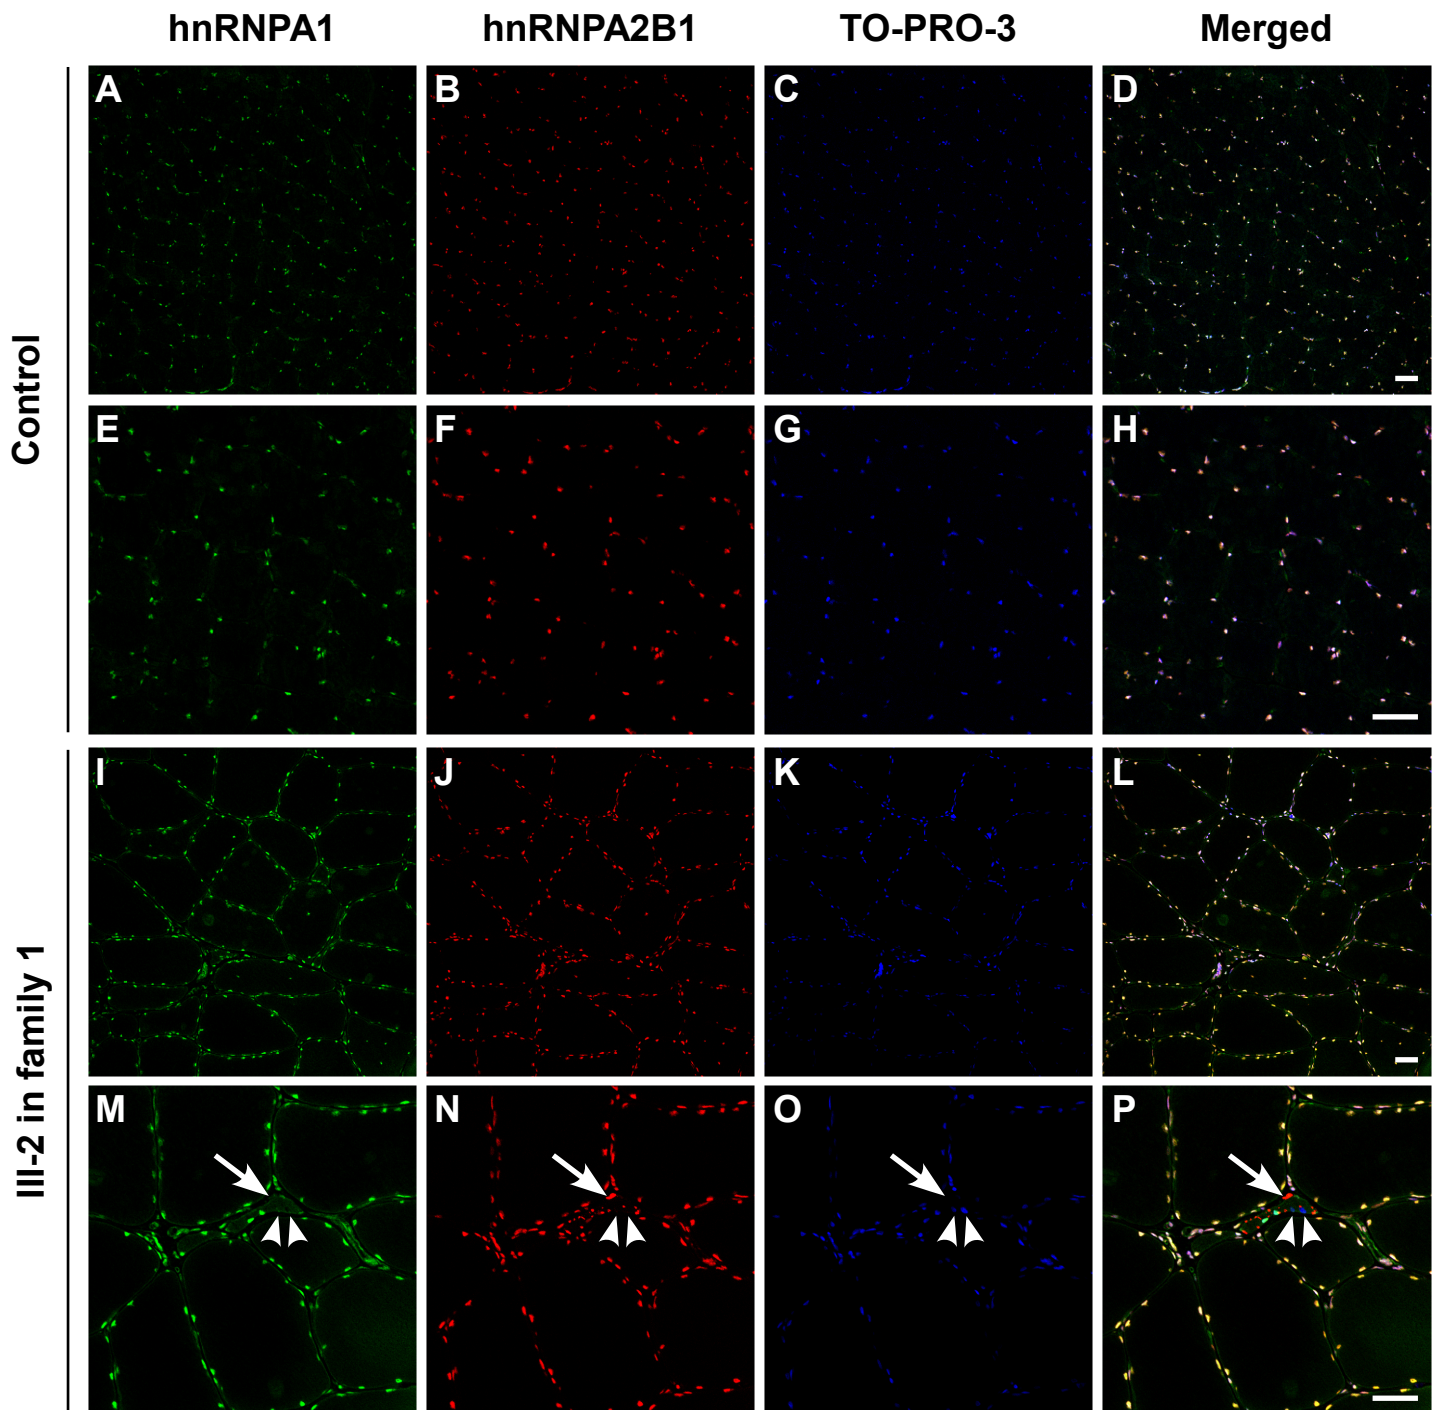

Representative microphotographs of transverse cryosections from the specimens of patient III-2 in family 1 and a control. **A–D** and **E–H**: In the control sections, hnRNPA1-like immunoreactivity was found exclusively in myonuclei, and it was colocalized with A2B1. **I–L** and **M–P**: In almost all of the fibers of the patients, myonuclei retained both hnRNPA1 and A2B1; however, nuclear depletion (arrowheads) and differential aggregation of the hnRNPs (arrows indicate A2B1) were rarely observed in exceedingly atrophied fibers (**M–P**). Bars = 50  $\mu$ m
